# Supplementary material for: Survival in Colon, Rectal and Small Intestinal Cancers in the Nordic Countries through a Half Century
Source: MDPI journal article supplement (doi:10.3390/cancers15030991), 2023-02-03
Supplement: s1 [file s1]

# SURVIVAL IN COLON, RECTAL AND SMALL INTESTINAL CANCERS IN THE NORDIC COUNTRIES THROUGH A HALF CENTURY

Filip Tichanek, Asta Försti, Akseli Hemminki, Kari Hemminki

## **Supplementary information**

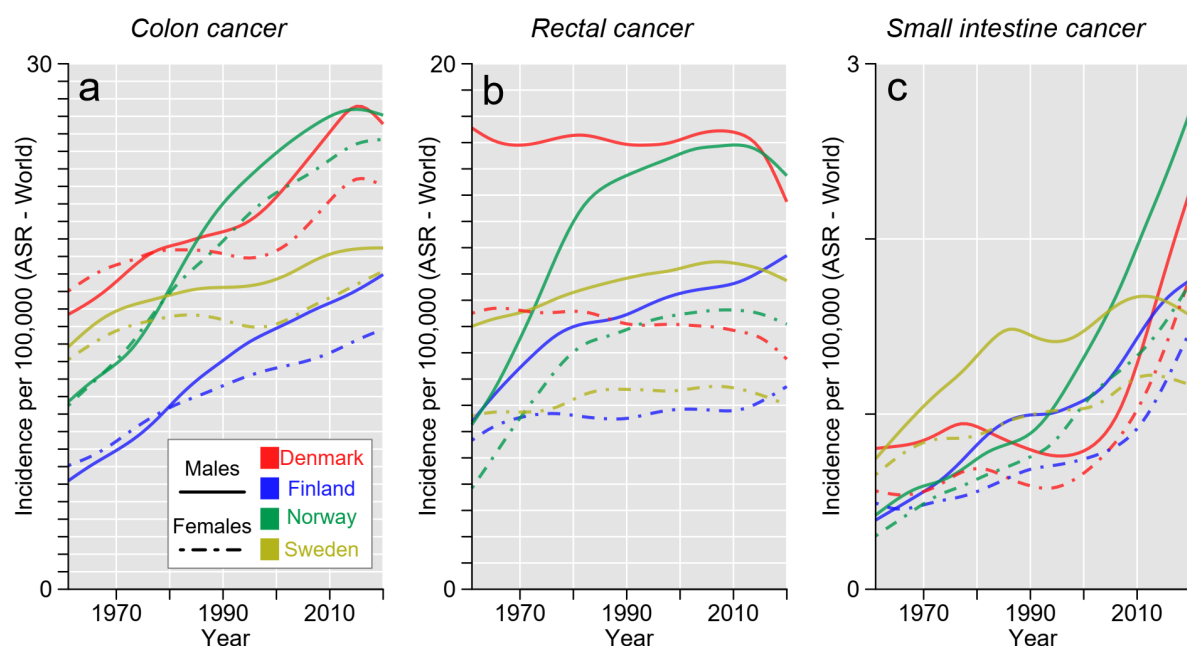

**Supplementary Fig. 1.** Incidence of colon (a), rectal (b) and small intestine (c) cancers from 1961 to 2020 in Denmark, Finland, Norway and Sweden, separately for males and females. Lines were smoothed via cubic smoothing spline.

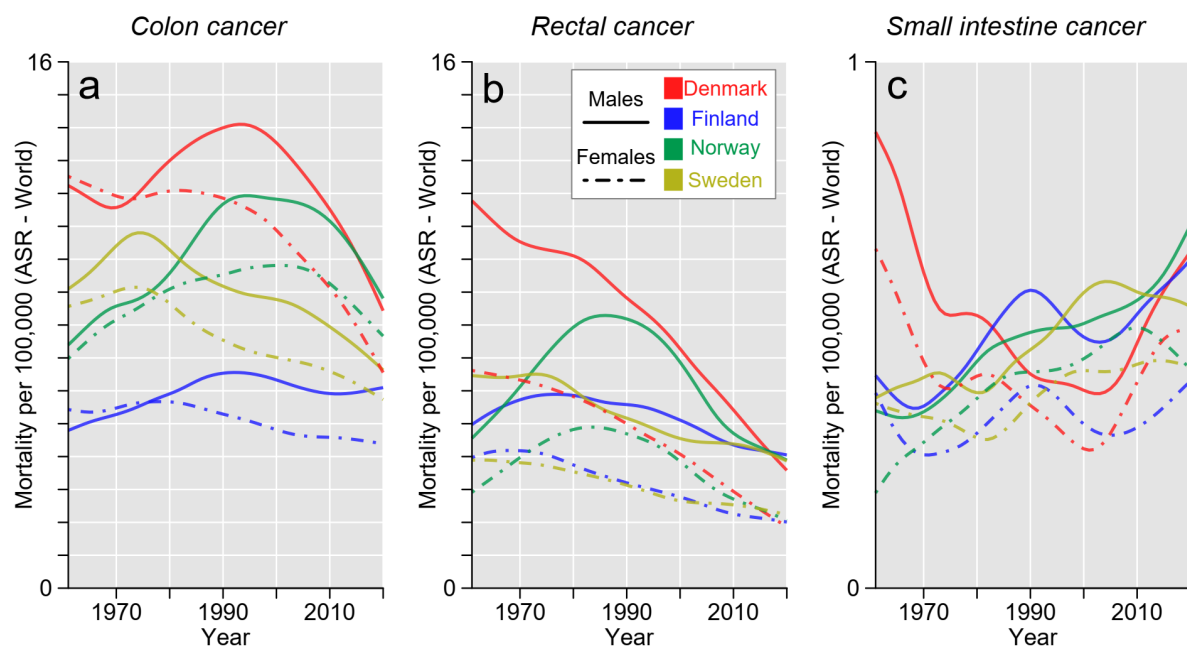

**Supplementary Fig. 2.** Mortality in colon (a), rectal (b) and small intestine (c) cancer patients from 1961 to 2020 in Denmark, Finland, Norway and Sweden, separately for males and females. Lines were smoothed via cubic smoothing spline.

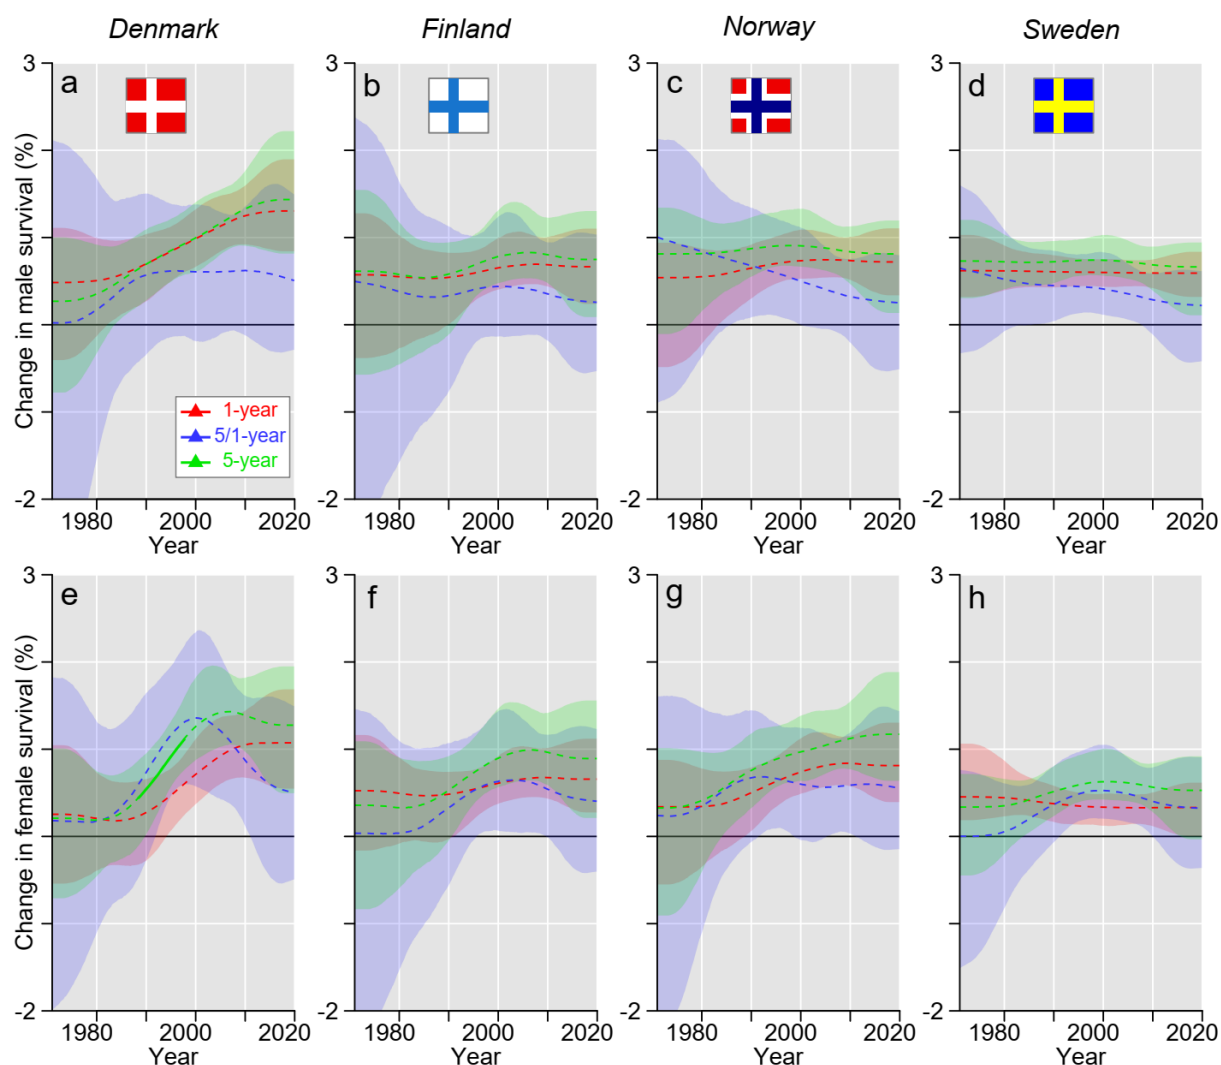

**Supplementary Fig 3.** The magnitude of change (per a year) in 1-year, 5-years and 5/1-year (4-years conditional) relative survival in small intestine cancer patients, separately for males (a-d) and females (e-h). Solid lines indicate at least 95% plausibility for the trend. All curves are color coded (see the insert).

**Supplementary Table 1.** 1-year relative survival [95% confidence interval] in colon, rectal and small intestine cancers from 1971 to 2020.

\*Significant increase between the marked and the next period.

| Male cancers    |                   |                   |                   |                   | Female cancers    |                   |                   |                   |
|-----------------|-------------------|-------------------|-------------------|-------------------|-------------------|-------------------|-------------------|-------------------|
| Colon           | Denmark           | Finland           | Norway            | Sweden            | Denmark           | Finland           | Norway            | Sweden            |
| 1971-1975       | 57.4 [55.5-59.4]* | 54.3 [50.8-57.9]* | 57.1 [54.8-59.5]* | 58.3 [56.9-59.8]* | 60.3 [58.6-62.1]  | 57.5 [55.1-60.1]* | 61.7 [59.7-63.8]* | 62.8 [61.5-64.1]* |
| 1976-1980       | 60.4 [58.7-62.1]  | 60.1 [57.2-63.2]* | 65.8 [63.8-67.8]* | 66.2 [64.8-67.6]* | 61.4 [59.9-62.9]* | 62.3 [60.1-64.5]* | 65.6 [63.9-67.4]* | 68.7 [67.5-70.0]* |
| 1981-1985       | 61.7 [60.0-63.4]* | 68.4 [66.0-70.9]  | 70.9 [69.2-72.7]  | 71.6 [70.3-72.9]* | 64.3 [62.9-65.8]* | 67.6 [65.7-69.6]* | 71.9 [70.4-73.5]  | 73.6 [72.5-74.8]* |
| 1986-1990       | 66.2 [64.7-67.9]  | 68.3 [66.1-70.6]* | 69.9 [68.2-71.6]* | 73.1 [71.8-74.3]* | 67.8 [66.4-69.2]* | 71.8 [70.0-73.6]* | 72.4 [70.9-73.9]* | 76.0 [74.9-77.1]* |
| 1991-1995       | 67.0 [65.5-68.6]* | 74.5 [72.6-76.4]* | 72.3 [70.8-73.9]* | 75.8 [74.6-76.9]* | 70.0 [68.6-71.4]* | 73.9 [72.3-75.6]* | 75.6 [74.2-76.9]* | 78.3 [77.3-79.4]* |
| 1996-2000       | 69.8 [68.4-71.3]* | 77.1 [75.3-78.8]* | 76.6 [75.2-78.0]  | 78.9 [77.8-80.0]* | 72.2 [70.9-73.6]* | 79.1 [77.6-80.6]* | 79.5 [78.3-80.7]  | 80.4 [79.4-81.4]* |
| 2001-2005       | 72.3 [71.0-73.7]* | 78.9 [77.4-80.4]* | 77.7 [76.4-79.0]* | 81.6 [80.6-82.6]* | 75.2 [74.0-76.4]* | 81.8 [80.5-83.2]  | 79.7 [78.6-80.9]* | 82.1 [81.2-83.1]* |
| 2006-2010       | 77.0 [75.8-78.1]* | 81.4 [80.1-82.7]* | 80.1 [79.0-81.3]* | 83.7 [82.8-84.6]  | 78.0 [76.9-79.1]* | 83.2 [82.0-84.4]  | 81.8 [80.7-82.9]* | 84.3 [83.5-85.2]  |
| 2011-2015       | 83.7 [82.8-84.6]* | 83.0 [81.8-84.2]  | 83.1 [82.1-84.1]* | 84.4 [83.6-85.3]* | 84.3 [83.4-85.2]* | 83.8 [82.7-85.0]* | 85.1 [84.2-86.0]* | 84.7 [83.9-85.5]* |
| 2016-2020       | 87.3 [86.5-88.1]  | 83.0 [81.9-84.1]  | 86.9 [86.0-87.8]  | 85.9 [85.2-86.7]  | 86.6 [85.8-87.4]  | 85.8 [84.8-86.8]  | 86.5 [85.6-87.3]  | 85.8 [85.1-86.6]  |
| Rectum          |                   |                   |                   |                   |                   |                   |                   |                   |
| 1971-1975       | 65.5 [63.6-67.5]  | 65.2 [62.0-68.6]* | 66.6 [64.0-69.3]* | 68.7 [67.0-70.4]* | 67.9 [65.8-70.1]  | 68.3 [65.5-71.2]  | 67.3 [64.6-70.1]* | 68.8 [67.0-70.7]* |
| 1976-1980       | 65.9 [64.1-67.8]* | 72.6 [70.0-75.4]* | 70.8 [68.6-72.9]* | 71.4 [69.8-73.0]* | 68.4 [66.5-70.4]* | 72.0 [69.6-74.5]  | 74.0 [71.9-76.2]* | 75.3 [73.6-77.1]* |
| 1981-1985       | 69.2 [67.4-71.0]* | 75.9 [73.5-78.4]  | 73.9 [72.1-75.9]* | 74.9 [73.4-76.5]* | 71.2 [69.3-73.0]  | 73.5 [71.1-75.9]* | 77.0 [75.0-79.0]  | 78.1 [76.7-79.7]* |
| 1986-1990       | 71.5 [69.7-73.2]* | 77.7 [75.4-80.1]  | 77.1 [75.3-78.9]* | 77.4 [76.0-78.8]* | 71.2 [69.4-73.1]* | 76.5 [74.3-78.8]* | 78.7 [76.8-80.7]* | 80.1 [78.7-81.6]* |
| 1991-1995       | 74.0 [72.4-75.6]  | 76.7 [74.6-78.8]* | 79.8 [78.2-81.5]  | 80.1 [78.8-81.4]* | 76.4 [74.6-78.2]  | 80.1 [78.1-82.1]* | 82.0 [80.3-83.6]  | 82.1 [80.8-83.5]* |
| 1996-2000       | 75.5 [73.9-77.1]* | 80.8 [78.9-82.8]  | 81.0 [79.4-82.7]* | 83.7 [82.5-84.8]  | 77.9 [76.2-79.5]* | 82.8 [81.0-84.7]  | 83.5 [81.9-85.2]* | 84.2 [82.9-85.5]* |
| 2001-2005       | 80.1 [78.7-81.5]* | 81.4 [79.7-83.3]* | 83.3 [81.9-84.7]* | 83.9 [82.8-85.0]* | 79.9 [78.3-81.6]* | 82.9 [81.2-84.7]* | 85.5 [84.1-87.1]* | 86.2 [85.1-87.4]* |
| 2006-2010       | 83.7 [82.5-85.0]* | 83.7 [82.2-85.3]  | 86.6 [85.4-87.9]* | 86.2 [85.2-87.2]* | 83.3 [81.9-84.8]* | 86.5 [85.0-88.1]  | 87.6 [86.3-89.0]* | 86.9 [85.8-88.1]* |
| 2011-2015       | 87.5 [86.5-88.6]* | 85.1 [83.8-86.5]* | 89.0 [87.9-90.2]  | 87.9 [87.0-88.8]* | 87.8 [86.5-89.0]* | 86.5 [85.0-88.0]* | 89.4 [88.1-90.6]* | 89.0 [88.0-90.1]  |
| 2016-2020       | 89.6 [88.6-90.6]  | 87.3 [86.1-88.5]  | 89.5 [88.4-90.5]  | 88.9 [88.0-89.8]  | 90.6 [89.4-91.7]  | 88.6 [87.3-89.9]  | 90.9 [89.7-92.1]  | 89.2 [88.2-90.2]  |
| Small Intestine |                   |                   |                   |                   |                   |                   |                   |                   |
| 1971-1975       | 49.1 [39.5-61.1]  |                   | 62.8 [50.8-77.5]  | 52.4 [46.6-58.8]* | 55.2 [45.7-66.7]  | 56.1 [43.8-71.8]  | 63.4 [53.6-74.8]  | 60.3 [54.6-66.6]* |
| 1976-1980       | 37.6 [30.4-46.4]* | 57.6 [45.8-72.4]  | 57.5 [47.7-69.4]  | 67.1 [61.0-73.7]  | 47.1 [39.1-56.7]* | 68.4 [58.1-80.4]  | 61.8 [51.7-73.9]  | 70.8 [65.0-77.2]  |
| 1981-1985       | 52.3 [43.6-62.6]  | 65.6 [56.3-76.5]  | 64.6 [56.9-73.4]  | 63.0 [57.9-68.6]  | 63.6 [56.0-72.3]  | 69.6 [60.9-79.6]  | 57.3 [49.3-66.7]* | 67.0 [61.7-72.7]  |
| 1986-1990       | 48.3 [40.4-57.9]  | 68.5 [60.2-77.9]  | 55.6 [46.8-66.0]  | 61.5 [56.5-66.9]* | 52.1 [44.0-61.8]  | 68.4 [60.7-77.1]  | 69.9 [62.2-78.6]  | 71.5 [67.0-76.4]  |
| 1991-1995       | 52.8 [45.0-61.8]  | 56.2 [48.2-65.6]* | 65.9 [58.2-74.5]  | 71.8 [67.5-76.3]  | 56.7 [48.4-66.4]  | 65.8 [58.1-74.5]  | 61.8 [54.4-70.2]  | 76.1 [72.0-80.5]  |
| 1996-2000       | 54.1 [46.4-63.2]  | 71.1 [63.9-79.0]  | 68.2 [61.5-75.5]* | 71.4 [67.4-75.7]  | 52.1 [44.6-60.7]* | 67.0 [59.4-75.6]* | 66.9 [60.3-74.2]  | 73.1 [69.0-77.5]  |
| 2001-2005       | 60.7 [53.6-68.8]  | 69.9 [62.9-77.6]  | 76.9 [71.5-82.7]  | 75.6 [72.0-79.4]* | 64.0 [56.6-72.3]  | 78.5 [72.5-85.1]  | 72.7 [67.1-78.9]  | 76.1 [72.1-80.2]  |
| 2006-2010       | 67.2 [60.8-74.3]* | 75.8 [70.3-81.7]* | 80.6 [76.0-85.4]  | 79.7 [76.6-83.0]  | 68.5 [62.4-75.3]  | 77.2 [71.7-83.1]* | 78.8 [73.9-83.9]  | 77.7 [74.3-81.2]  |
| 2011-2015       | 75.1 [70.7-79.7]* | 81.8 [77.6-86.3]  | 80.1 [76.2-84.3]* | 79.3 [76.3-82.5]* | 72.3 [67.0-77.9]* | 84.0 [79.8-88.5]  | 82.8 [78.7-87.2]  | 80.4 [77.3-83.6]  |
| 2016-2020       | 81.4 [78.2-84.8]  | 82.6 [79.0-86.4]  | 86.7 [83.6-89.8]  | 84.9 [82.2-87.7]  | 79.3 [75.6-83.2]  | 86.4 [83.0-90.0]  | 86.3 [83.0-89.8]  | 80.9 [77.8-84.2]  |

**Supplementary Table 2.** 5-year relative survival [95% confidence interval] in colon, rectal and small intestine cancers from 1971 to 2020.

\*Significant increase between the marked and the next period.

| Male cancers    |                   |                   |                   |                   | Female cancers    |                   |                   |                   |  |
|-----------------|-------------------|-------------------|-------------------|-------------------|-------------------|-------------------|-------------------|-------------------|--|
| Colon           | Denmark           | Finland           | Norway            | Sweden            | Denmark           | Finland           | Norway            | Sweden            |  |
| 1971-1975       | 35.6 [33.5-37.9]  | 34.5 [30.9-38.6]* | 39.7 [37.0-42.6]* | 38.4 [36.8-40.2]* | 38.3 [36.4-40.2]  | 35.9 [33.3-38.6]* | 41.1 [38.8-43.5]* | 42.4 [40.9-44.0]* |  |
| 1976-1980       | 38.5 [36.5-40.6]  | 39.5 [36.2-43.1]* | 43.4 [41.0-45.9]* | 45.8 [44.1-47.6]* | 39.2 [37.5-40.9]* | 40.1 [37.8-42.5]* | 44.8 [42.8-46.9]* | 47.7 [46.2-49.3]* |  |
| 1981-1985       | 37.7 [35.7-39.7]* | 47.7 [44.7-51.0]  | 49.1 [46.9-51.5]  | 49.1 [47.4-50.8]* | 42.3 [40.6-44.1]* | 46.8 [44.5-49.2]* | 49.2 [47.3-51.2]* | 54.0 [52.5-55.4]  |  |
| 1986-1990       | 42.3 [40.3-44.3]* | 49.1 [46.2-52.2]* | 47.8 [45.7-50.1]* | 51.5 [49.9-53.2]* | 45.6 [43.9-47.3]* | 53.9 [51.7-56.2]  | 52.5 [50.7-54.4]  | 54.8 [53.4-56.2]* |  |
| 1991-1995       | 44.9 [43.0-46.9]* | 54.9 [52.2-57.7]* | 50.2 [48.3-52.3]* | 55.5 [54.0-57.1]  | 48.2 [46.6-50.0]* | 55.0 [52.9-57.2]* | 54.3 [52.6-56.1]* | 57.4 [56.0-58.9]* |  |
| 1996-2000       | 48.4 [46.6-50.4]* | 58.5 [56.0-61.0]  | 56.6 [54.7-58.6]  | 56.6 [55.1-58.2]* | 50.8 [49.2-52.6]* | 61.6 [59.6-63.6]* | 59.1 [57.4-60.8]* | 59.3 [57.9-60.8]* |  |
| 2001-2005       | 53.1 [51.4-54.9]* | 59.4 [57.3-61.7]* | 58.1 [56.4-59.9]* | 58.6 [57.2-60.0]* | 57.4 [55.8-59.1]* | 64.4 [62.6-66.3]  | 61.3 [59.7-62.9]* | 63.5 [62.2-64.9]* |  |
| 2006-2010       | 58.8 [57.3-60.4]* | 63.8 [61.9-65.7]* | 61.7 [60.1-63.4]* | 64.5 [63.2-65.8]* | 59.6 [58.1-61.1]* | 64.6 [62.9-66.4]* | 65.3 [63.8-66.9]* | 67.0 [65.8-68.3]* |  |
| 2011-2015       | 68.3 [66.8-69.7]* | 66.1 [64.3-67.9]  | 65.1 [63.6-66.6]* | 66.2 [65.0-67.5]* | 69.3 [68.0-70.6]* | 68.6 [67.0-70.3]  | 69.6 [68.3-71.0]* | 68.5 [67.3-69.6]* |  |
| 2016-2020       | 72.9 [71.6-74.2]  | 66.1 [64.5-67.8]  | 69.8 [68.4-71.2]  | 68.7 [67.5-69.8]  | 73.0 [71.7-74.2]  | 69.9 [68.3-71.5]  | 72.0 [70.7-73.3]  | 70.6 [69.5-71.7]  |  |
| Rectum          |                   |                   |                   |                   |                   |                   |                   |                   |  |
| 1971-1975       | 35.0 [32.8-37.3]  | 31.1 [27.7-34.9]* | 33.9 [31.0-37.1]* | 36.2 [34.2-38.3]* | 37.2 [34.9-39.8]* | 35.4 [32.3-38.7]* | 38.7 [35.6-42.1]* | 40.8 [38.7-43.1]* |  |
| 1976-1980       | 35.8 [33.7-38.0]  | 39.1 [35.9-42.5]  | 39.8 [37.1-42.6]* | 40.7 [38.8-42.8]* | 40.4 [38.1-42.8]  | 41.4 [38.6-44.3]  | 46.0 [43.3-49.0]* | 45.7 [43.6-48.0]* |  |
| 1981-1985       | 36.6 [34.6-38.8]* | 42.3 [39.2-45.8]* | 44.4 [41.9-47.0]* | 45.1 [43.1-47.1]* | 41.0 [38.8-43.3]  | 43.8 [41.0-46.9]* | 49.1 [46.5-51.8]* | 49.8 [47.8-51.9]* |  |
| 1986-1990       | 39.6 [37.5-41.8]* | 47.9 [44.7-51.3]  | 47.4 [45.0-50.0]* | 47.7 [45.8-49.6]* | 42.2 [40.0-44.5]* | 48.6 [45.7-51.7]* | 52.9 [50.3-55.7]* | 52.3 [50.3-54.4]* |  |
| 1991-1995       | 43.8 [41.8-46.0]* | 49.9 [47.0-52.9]* | 51.6 [49.2-54.1]* | 53.9 [52.0-55.8]* | 47.8 [45.5-50.2]* | 54.4 [51.6-57.3]* | 57.9 [55.5-60.4]* | 58.5 [56.6-60.5]* |  |
| 1996-2000       | 47.6 [45.5-49.8]* | 56.1 [53.3-59.1]* | 57.4 [55.0-59.9]* | 57.2 [55.4-59.0]  | 50.8 [48.5-53.2]* | 58.5 [55.9-61.2]* | 61.2 [58.8-63.6]* | 61.5 [59.6-63.5]* |  |
| 2001-2005       | 56.0 [54.0-58.1]* | 59.4 [56.8-62.0]* | 60.8 [58.7-63.0]* | 58.7 [57.0-60.4]* | 55.9 [53.6-58.2]* | 62.7 [60.2-65.2]* | 67.2 [64.9-69.5]  | 64.4 [62.6-66.2]  |  |
| 2006-2010       | 61.6 [59.7-63.6]* | 64.3 [62.0-66.8]  | 67.3 [65.3-69.4]* | 63.9 [62.3-65.6]* | 64.2 [62.1-66.4]* | 68.3 [66.0-70.8]* | 68.2 [66.0-70.5]  | 65.5 [63.7-67.3]* |  |
| 2011-2015       | 70.3 [68.5-72.1]  | 64.1 [61.9-66.3]* | 70.0 [68.1-71.9]  | 67.8 [66.3-69.3]  | 71.9 [69.9-74.0]* | 71.1 [68.8-73.4]* | 70.2 [68.1-72.3]* | 69.5 [67.8-71.2]  |  |
| 2016-2020       | 72.0 [70.3-73.7]  | 66.9 [64.9-69.1]  | 71.6 [69.8-73.4]  | 69.2 [67.7-70.7]  | 74.9 [73.0-76.9]  | 73.5 [71.4-75.7]  | 73.3 [71.2-75.3]  | 70.8 [69.2-72.6]  |  |
| Small Intestine |                   |                   |                   |                   |                   |                   |                   |                   |  |
| 1971-1975       | 31.6 [21.9-45.6]  |                   | 38.1 [24.6-58.9]  | 31.9 [25.9-39.2]* | 24.9 [16.7-37.2]  | 37.0 [22.2-61.6]  | 41.6 [31.3-55.2]  | 41.6 [35.4-48.9]* |  |
| 1976-1980       | 19.5 [13.4-28.5]  | 37.4 [26.2-53.3]  | 30.1 [20.0-45.5]  | 43.6 [35.7-53.4]  | 22.9 [16.4-32.2]* | 46.0 [35.8-59.2]  | 33.6 [23.8-47.5]  | 50.3 [43.0-58.9]  |  |
| 1981-1985       | 27.3 [19.4-38.4]  | 47.5 [35.5-63.5]  | 37.9 [29.1-49.3]  | 43.6 [37.8-50.3]  | 32.5 [24.8-42.5]  | 47.7 [37.7-60.3]  | 37.0 [28.8-47.5]  | 43.1 [37.3-49.8]  |  |
| 1986-1990       | 27.9 [20.2-38.7]  | 52.9 [42.1-66.4]  | 39.3 [30.1-51.2]  | 41.1 [35.7-47.4]* | 21.6 [15.0-31.2]  | 37.9 [29.6-48.5]  | 39.8 [31.1-50.8]  | 42.0 [36.8-48.0]* |  |
| 1991-1995       | 35.4 [27.1-46.3]  | 32.8 [24.9-43.1]* | 49.8 [40.7-60.8]  | 49.0 [43.4-55.4]  | 30.7 [22.8-41.4]  | 42.9 [34.5-53.4]  | 42.1 [34.2-51.7]  | 50.5 [45.3-56.3]  |  |
| 1996-2000       | 32.1 [24.6-42.0]  | 56.7 [47.0-68.3]  | 46.2 [38.0-56.1]* | 51.6 [46.3-57.5]* | 29.9 [22.9-38.9]* | 46.8 [38.4-57.1]* | 50.9 [43.4-59.8]  | 51.7 [46.7-57.2]  |  |
| 2001-2005       | 41.2 [33.5-50.7]  | 48.3 [40.2-57.9]* | 56.3 [49.4-64.2]* | 57.8 [53.0-63.0]  | 42.1 [34.1-51.9]* | 58.1 [50.4-67.1]  | 55.6 [48.8-63.3]  | 56.4 [51.4-61.8]  |  |
| 2006-2010       | 46.3 [39.1-54.7]* | 61.3 [54.1-69.5]  | 65.8 [59.6-72.6]  | 61.9 [57.6-66.5]  | 52.2 [45.3-60.3]  | 61.3 [54.5-69.1]  | 58.6 [52.4-65.5]  | 60.7 [56.4-65.4]  |  |
| 2011-2015       | 55.0 [49.3-61.3]* | 63.3 [57.3-70.0]  | 63.5 [58.3-69.2]  | 62.9 [58.8-67.3]  | 54.7 [48.7-61.5]* | 64.3 [58.3-70.9]  | 65.3 [59.4-71.6]* | 61.7 [57.4-66.2]  |  |
| 2016-2020       | 62.3 [57.3-67.6]  | 65.1 [59.7-71.0]  | 67.9 [62.9-73.3]  | 66.0 [61.8-70.4]  | 62.1 [57.0-67.8]  | 70.3 [64.8-76.1]  | 72.9 [67.8-78.5]  | 64.1 [59.9-68.6]  |  |

**Supplementary Table 3.** 5/1-year (4-years conditional) survival in colon, rectal and small intestine cancers from 1971 to 2020.

| Male cancers           |         |         |        |        | Female cancers |         |        |        |
|------------------------|---------|---------|--------|--------|----------------|---------|--------|--------|
| Colon                  | Denmark | Finland | Norway | Sweden | Denmark        | Finland | Norway | Sweden |
| 1971-1975              | 62.0    | 63.5    | 69.5   | 65.9   | 63.5           | 62.4    | 66.6   | 67.5   |
| 1976-1980              | 63.7    | 65.7    | 66.0   | 69.2   | 63.8           | 64.4    | 68.3   | 69.4   |
| 1981-1985              | 61.1    | 69.7    | 69.3   | 68.6   | 65.8           | 69.2    | 68.4   | 73.4   |
| 1986-1990              | 63.9    | 71.9    | 68.4   | 70.5   | 67.3           | 75.1    | 72.5   | 72.1   |
| 1991-1995              | 67.0    | 73.7    | 69.4   | 73.2   | 68.9           | 74.4    | 71.8   | 73.3   |
| 1996-2000              | 69.3    | 75.9    | 73.9   | 71.7   | 70.4           | 77.9    | 74.3   | 73.8   |
| 2001-2005              | 73.4    | 75.3    | 74.8   | 71.8   | 76.3           | 78.7    | 76.9   | 77.3   |
| 2006-2010              | 76.4    | 78.4    | 77.0   | 77.1   | 76.4           | 77.6    | 79.8   | 79.5   |
| 2011-2015              | 81.6    | 79.6    | 78.3   | 78.4   | 82.2           | 81.9    | 81.8   | 80.9   |
| 2016-2020              | 83.5    | 79.6    | 80.3   | 80.0   | 84.3           | 81.5    | 83.2   | 82.3   |
| <b>Rectum</b>          |         |         |        |        |                |         |        |        |
| 1971-1975              | 53.4    | 47.7    | 50.9   | 52.7   | 54.8           | 51.8    | 57.5   | 59.3   |
| 1976-1980              | 54.3    | 53.9    | 56.2   | 57.0   | 59.1           | 57.5    | 62.2   | 60.7   |
| 1981-1985              | 52.9    | 55.7    | 60.1   | 60.2   | 57.6           | 59.6    | 63.8   | 63.8   |
| 1986-1990              | 55.4    | 61.6    | 61.5   | 61.6   | 59.3           | 63.5    | 67.2   | 65.3   |
| 1991-1995              | 59.2    | 65.1    | 64.7   | 67.3   | 62.6           | 67.9    | 70.6   | 71.3   |
| 1996-2000              | 63.0    | 69.4    | 70.9   | 68.3   | 65.2           | 70.7    | 73.3   | 73.0   |
| 2001-2005              | 69.9    | 73.0    | 73.0   | 70.0   | 70.0           | 75.6    | 78.6   | 74.7   |
| 2006-2010              | 73.6    | 76.8    | 77.7   | 74.1   | 77.1           | 79.0    | 77.9   | 75.4   |
| 2011-2015              | 80.3    | 75.3    | 78.7   | 77.1   | 81.9           | 82.2    | 78.5   | 78.1   |
| 2016-2020              | 80.4    | 76.6    | 80.0   | 77.8   | 82.7           | 83.0    | 80.6   | 79.4   |
| <b>Small Intestine</b> |         |         |        |        |                |         |        |        |
| 1971-1975              | 64.4    |         | 60.7   | 60.9   | 45.1           | 66.0    | 65.6   | 69.0   |
| 1976-1980              | 51.9    | 64.9    | 52.3   | 65.0   | 48.6           | 67.3    | 54.4   | 71.0   |
| 1981-1985              | 52.2    | 72.4    | 58.7   | 69.2   | 51.1           | 68.5    | 64.6   | 64.3   |
| 1986-1990              | 57.8    | 77.2    | 70.7   | 66.8   | 41.5           | 55.4    | 56.9   | 58.7   |
| 1991-1995              | 67.0    | 58.4    | 75.6   | 68.2   | 54.1           | 65.2    | 68.1   | 66.4   |
| 1996-2000              | 59.3    | 79.7    | 67.7   | 72.3   | 57.4           | 69.9    | 76.1   | 70.7   |
| 2001-2005              | 67.9    | 69.1    | 73.2   | 76.5   | 65.8           | 74.0    | 76.5   | 74.1   |
| 2006-2010              | 68.9    | 80.9    | 81.6   | 77.7   | 76.2           | 79.4    | 74.4   | 78.1   |
| 2011-2015              | 73.2    | 77.4    | 79.3   | 79.3   | 75.7           | 76.5    | 78.9   | 76.7   |
| 2016-2020              | 76.5    | 78.8    | 78.3   | 77.7   | 78.3           | 81.4    | 84.5   | 79.2   |
